# Supplementary material for: Ternary covalent conjugate (antibody–gold nanoparticle–peroxidase) for signal enhancement in enzyme immunoassay
Source: Royal Society of Chemistry journal article supplement (doi:10.1039/c6ra04785h), 2016-01-01
Supplement: c6ra04785h1.pdf [file c6ra04785h1.pdf]

Electronic Supplementary Information

**Ternary covalent conjugate (antibody-gold nanoparticle-peroxidase) for signal enhancement in enzyme immunoassay**

Marina M. Vdovenko<sup>1</sup>, Nadezhda A. Byzova<sup>2</sup>, Anatoly V. Zherdev<sup>2</sup>, Boris B. Dzantiev<sup>2</sup> and

Ivan Yu. Sakharov<sup>1\*</sup>

<sup>1</sup>Chemistry Department, Lomonosov Moscow State University, Moscow 119991, Russia

<sup>2</sup>A.N. Bakh Institute of Biochemistry, Research Center of Biotechnology of the Russian Academy of Sciences, Moscow 119071, Russia

**Determination of HRP content in the Ab-GNPs-HRP conjugate**

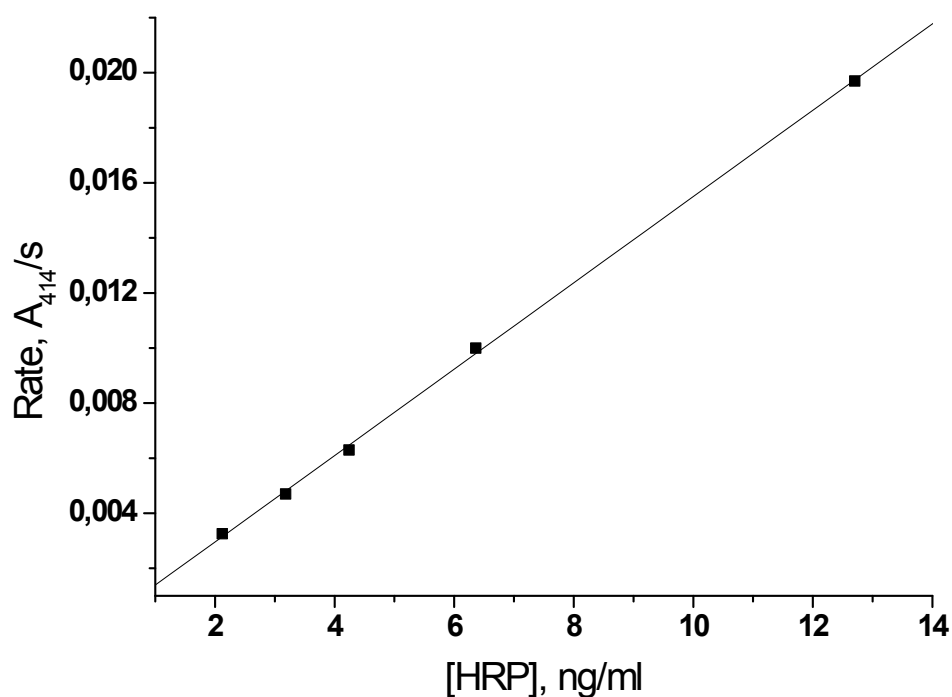

Fig. S1. Calibration curve for the determination of HRP content using ABTS as a substrate.

The concentration of GNPs calculated from the absorbance ( $A_{535}$ ) in the Ab-GNPs-HRP solution was  $1.46 \times 10^{14}$  particles/L. The determination of rate of ABTS oxidation catalyzed by Ab-GNPs-HRP and use of the calibration curve for native HRP allowed calculating the HRP concentration in the Ab-GNPs-HRP solution equal to  $3.09 \times 10^{-9}$  moles/L. Therefore, each GNP of the conjugate contains covalently immobilized HRP whose activity is equivalent to that of 13 molecules of native HRP.

## Determination of Ab IC4 content in the Ab IC4-GNPs-HRP conjugate

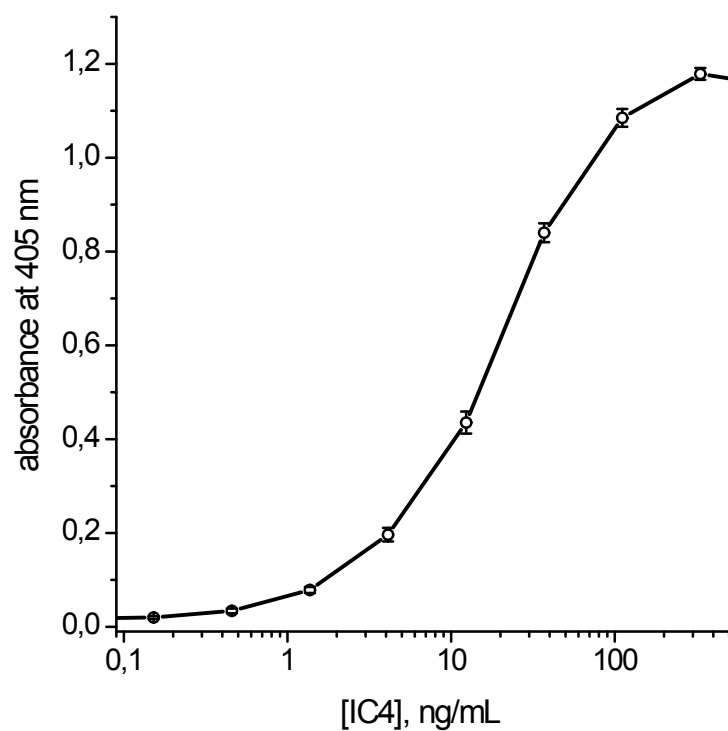

Fig. S2. Calibration curve for the determination of Ab IC4 content with sandwich ELISA.

ELISA allowed determining the Ab IC4 concentration in the Ab-GNPs-HRP solution equal to  $1.86 \times 10^{-10}$  moles/L. Therefore, each GNP of the conjugate contains covalently immobilized Ab IC4 whose activity is equivalent to that of 1 molecule of the intact antibody.
